# Supplementary material for: Bulk and solution properties of a thermo-responsive rod–coil block polymer based on poly(N-isopropylacrylamide)
Source: Royal Society of Chemistry journal article supplement (doi:10.1039/c4ra07179d), 2014-01-01
Supplement: c4ra07179d1.pdf [file c4ra07179d1.pdf]

## Electronic Supplementary Information (ESI)

### Bulk and solution properties of thermo-responsive rod-coil block polymer based on poly(*N*-isopropylacrylamide)

Peng Liu<sup>a,b</sup>, Jiexing Liang<sup>a</sup>, Shen Chen<sup>a</sup> and Hailiang Zhang\*<sup>a</sup>

<sup>a</sup> Key laboratory of polymeric materials & application technology of Hunan Province, key laboratory of advanced functional polymer materials of colleges of Hunan Province, College of Chemistry, Xiangtan University, Xiangtan, Hunan, 411105, China. Email: [zh11965@xtu.edu.cn](mailto:zh11965@xtu.edu.cn)

<sup>b</sup> College of Chemistry and Chemical Engineering, Qujing Normal University, Qujing, Yunnan, 655011, China. Email: [liupengxj@gmail.com](mailto:liupengxj@gmail.com)

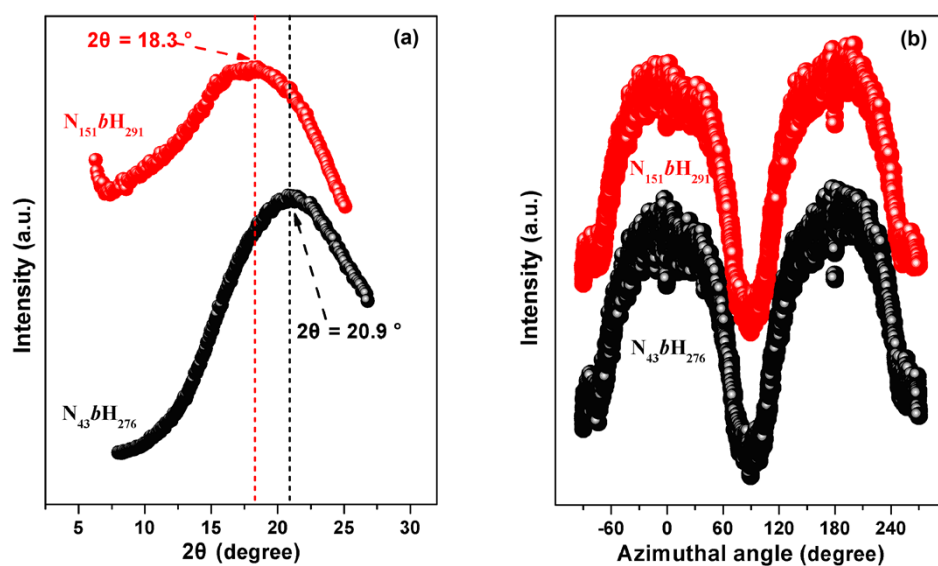

**Fig.S1** The intensity profiles (a) are along the meridian obtained from Fig.7. The azimuthal scanning profiles (b) of the high  $2\theta$  angle diffraction along the meridian detected from Fig.7.

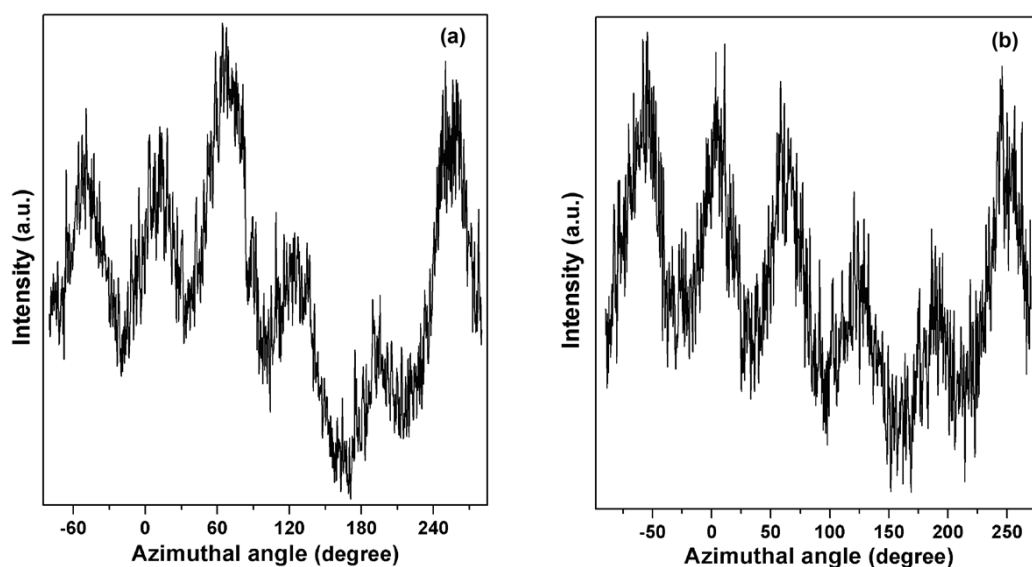

**Fig.S2** The X-ray incident beam is parallel to the shear direction. The azimuthal profiles (a) and (b) obtained from Fig.8a and Fig.8b, respectively.

Table S1. Elemental Analysis of the PNIPAm-*b*-PHIPPVTAs

| Sample                                     | Formula                                                                                | Elemental analysis (%) <sup>a</sup> |       |      |       |      |
|--------------------------------------------|----------------------------------------------------------------------------------------|-------------------------------------|-------|------|-------|------|
|                                            |                                                                                        |                                     | C     | H    | N     | S    |
| N <sub>43</sub>                            | C <sub>265</sub> H <sub>485</sub> N <sub>43</sub> O <sub>45</sub> S <sub>3</sub>       | Calcd.                              | 62.53 | 9.60 | 11.83 | 1.89 |
|                                            |                                                                                        | Found                               | 62.07 | 9.69 | 11.56 | 1.84 |
| N <sub>43</sub> <i>b</i> H <sub>28</sub>   | C <sub>937</sub> H <sub>1325</sub> N <sub>99</sub> O <sub>213</sub> S <sub>3</sub>     | Calcd.                              | 64.38 | 7.64 | 7.93  | 0.55 |
|                                            |                                                                                        | Found                               | 63.22 | 7.91 | 7.76  | 0.51 |
| N <sub>43</sub> <i>b</i> H <sub>75</sub>   | C <sub>2305</sub> H <sub>3035</sub> N <sub>213</sub> O <sub>555</sub> S <sub>3</sub>   | Calcd.                              | 64.83 | 7.16 | 6.99  | 0.23 |
|                                            |                                                                                        | Found                               | 63.66 | 7.28 | 7.20  | 0.21 |
| N <sub>43</sub> <i>b</i> H <sub>95</sub>   | C <sub>2545</sub> H <sub>3335</sub> N <sub>233</sub> O <sub>615</sub> S <sub>3</sub>   | Calcd.                              | 64.86 | 7.13 | 6.92  | 0.20 |
|                                            |                                                                                        | Found                               | 65.41 | 7.24 | 6.87  | 0.21 |
| N <sub>43</sub> <i>b</i> H <sub>134</sub>  | C <sub>3481</sub> H <sub>4505</sub> N <sub>311</sub> O <sub>849</sub> S <sub>3</sub>   | Calcd.                              | 64.94 | 7.05 | 6.77  | 0.15 |
|                                            |                                                                                        | Found                               | 64.74 | 7.15 | 6.58  | 0.13 |
| N <sub>43</sub> <i>b</i> H <sub>190</sub>  | C <sub>4825</sub> H <sub>6185</sub> N <sub>423</sub> O <sub>1185</sub> S <sub>3</sub>  | Calcd.                              | 64.99 | 6.99 | 6.64  | 0.11 |
|                                            |                                                                                        | Found                               | 64.07 | 7.12 | 6.18  | 0.13 |
| N <sub>43</sub> <i>b</i> H <sub>203</sub>  | C <sub>5137</sub> H <sub>6575</sub> N <sub>449</sub> O <sub>1263</sub> S <sub>3</sub>  | Calcd.                              | 65.00 | 6.98 | 6.63  | 0.11 |
|                                            |                                                                                        | Found                               | 63.11 | 6.57 | 6.89  | 0.11 |
| N <sub>43</sub> <i>b</i> H <sub>276</sub>  | C <sub>6889</sub> H <sub>8765</sub> N <sub>595</sub> O <sub>1701</sub> S <sub>3</sub>  | Calcd.                              | 65.04 | 6.94 | 6.55  | 0.10 |
|                                            |                                                                                        | Found                               | 66.19 | 7.61 | 7.96  | 0.07 |
| N <sub>151</sub>                           | C <sub>913</sub> H <sub>1673</sub> N <sub>151</sub> O <sub>153</sub> S <sub>3</sub>    | Calcd.                              | 63.35 | 9.74 | 12.22 | 0.56 |
|                                            |                                                                                        | Found                               | 61.89 | 9.87 | 12.06 | 0.52 |
| N <sub>151</sub> <i>b</i> H <sub>19</sub>  | C <sub>1369</sub> H <sub>2243</sub> N <sub>189</sub> O <sub>267</sub> S <sub>3</sub>   | Calcd.                              | 63.93 | 8.79 | 10.29 | 0.37 |
|                                            |                                                                                        | Found                               | 64.58 | 8.05 | 10.58 | 0.32 |
| N <sub>151</sub> <i>b</i> H <sub>90</sub>  | C <sub>3073</sub> H <sub>4373</sub> N <sub>331</sub> O <sub>693</sub> S <sub>3</sub>   | Calcd.                              | 64.60 | 7.71 | 8.11  | 0.17 |
|                                            |                                                                                        | Found                               | 63.15 | 8.36 | 7.69  | 0.16 |
| N <sub>151</sub> <i>b</i> H <sub>146</sub> | C <sub>4417</sub> H <sub>6053</sub> N <sub>443</sub> O <sub>1029</sub> S <sub>3</sub>  | Calcd.                              | 64.76 | 7.45 | 7.57  | 0.12 |
|                                            |                                                                                        | Found                               | 63.21 | 8.01 | 6.99  | 0.12 |
| N <sub>151</sub> <i>b</i> H <sub>171</sub> | C <sub>5017</sub> H <sub>6803</sub> N <sub>493</sub> O <sub>1179</sub> S <sub>3</sub>  | Calcd.                              | 64.81 | 7.37 | 7.43  | 0.10 |
|                                            |                                                                                        | Found                               | 63.58 | 7.58 | 6.85  | 0.12 |
| N <sub>151</sub> <i>b</i> H <sub>291</sub> | C <sub>7897</sub> H <sub>10403</sub> N <sub>733</sub> O <sub>1899</sub> S <sub>3</sub> | Calcd.                              | 64.93 | 7.18 | 7.03  | 0.07 |
|                                            |                                                                                        | Found                               | 65.45 | 7.26 | 6.66  | 0.06 |

<sup>a</sup> The elemental analyses of polymers were measured by Vario EL III.
